# Supplementary material for: Electrophysiological Assessment of Newly Synthesized 2,3-Benzodiazepine Derivatives for Inhibiting the AMPA Receptor Channel
Source: MDPI journal article supplement (doi:10.3390/molecules28166067), 2023-08-15

*Article*

# **Electrophysiological Assessment of Newly Synthesized 2,3-Benzodiazepine Derivatives for Inhibiting the AMPA Receptor Channel**

**Mohammad Qneibi <sup>1,\*</sup>, Hanan Jumaa <sup>2</sup>, Sosana Bdir <sup>1</sup> and Nawaf Al-Maharik <sup>2,\*</sup>**

<sup>1</sup> Department of Biomedical Sciences, Faculty of Medicine and Health Sciences, An-Najah National University, Nablus P.O. Box 7, Palestine; s12027767@stu.najah.edu

<sup>2</sup> Department of Chemistry, Faculty of Sciences, An-Najah National University, Nablus P.O. Box 7, Palestine; hjumaa97@gmail.com

\* Correspondence: mqneibi@najah.edu (M.Q.); n.maharik@najah.edu (N.A.-M.)

## **Supplementary Material**

Table S1-S4: Whole-cell recording of data analysis for 2,3-BDZ compounds;

Table S5: IC<sub>50</sub> values. IC<sub>50</sub> calculated values for 2,3-BDZ compounds;

Figure S1: The inhibition assays of four 2,3-BDZ derivatives on GluA1, GluA2, GluA1/2, and GluA2/3 subunits

## Table of Contents

|                                                                                                                              |    |
|------------------------------------------------------------------------------------------------------------------------------|----|
| Supplemental Table S1 Whole-cell recordings for compound 2,3-BDZ-1.....                                                      | 4  |
| Supplemental Table S2 Whole-cell recordings for compound 2,3-BDZ-2.....                                                      | 5  |
| Supplemental Table S3 Whole-cell recordings for compound 2,3-BDZ-3.....                                                      | 6  |
| Supplemental Table S4 Whole-cell recordings for compound 2,3-BDZ-4.....                                                      | 7  |
| Supplemental Table S5 IC <sub>50</sub> values.....                                                                           | 9  |
| Supplemental Figure S1 The inhibition assays of four 2,3-BDZ derivatives on GluA1, GluA2, GluA1/2, and GluA2/3 subunits..... | 10 |

**Supplemental Table S1 Whole-Cell Recordings for Compound 2,3-BDZ-1**

| Receptor Name/Compounds abbreviation | GluA1 (Glutamate Alone)   | 2,3-BDZ-1   | Applying Glutamate Alone After 2,3-BDZ-1 | n | A/A <sub>1</sub> |
|--------------------------------------|---------------------------|-------------|------------------------------------------|---|------------------|
| Amplitude (pA)                       | 933±30                    | 85±7.0***   | 935±39                                   | 8 | 11.08±1.0        |
| t deact (ms)                         | 2.1±0.1                   | 6.3±0.4***  | N/R                                      | 8 | N/R              |
| t des (ms)                           | 2.3±0.1                   | 1.1±0.1***  | N/R                                      | 8 | N/R              |
| Receptor Name/Compounds abbreviation | GluA1/2 (Glutamate Alone) | 2,3-BDZ-1   | Applying Glutamate Alone After 2,3-BDZ-1 | n | A/A <sub>1</sub> |
| Amplitude (pA)                       | 573±34                    | 51±7.0***   | 575±35                                   | 8 | 11.21±1.0        |
| t deact (ms)                         | 2.6±0.2                   | 6.7±0.6***  | N/R                                      | 8 | N/R              |
| t des (ms)                           | 5.1±0.4                   | 2.7±0.2***  | N/R                                      | 8 | N/R              |
| Receptor Name/Compounds abbreviation | GluA2 (Glutamate Alone)   | 2,3-BDZ-1   | Applying Glutamate Alone After 2,3-BDZ-1 | n | A/A <sub>1</sub> |
| Amplitude (pA)                       | 1318±28                   | 108±9.0***  | 1322±33                                  | 8 | 12.31±1.0        |
| t deact (ms)                         | 2.4±0.1                   | 8.7±0.6***  | N/R                                      | 8 | N/R              |
| t des (ms)                           | 2.7±0.1                   | 0.6±0.05*** | N/R                                      | 8 | N/R              |
| Receptor Name/Compounds abbreviation | GluA2/3 (Glutamate Alone) | 2,3-BDZ-1   | Applying Glutamate Alone After 2,3-BDZ-1 | n | A/A <sub>1</sub> |
| Amplitude                            | 588±19                    | 49±4***     | 589±33                                   | 8 | 12.09±1.0        |

|                        |         |             |     |   |     |
|------------------------|---------|-------------|-----|---|-----|
| (pA)                   |         |             |     |   |     |
| <b>t deact</b><br>(ms) | 2.5±0.2 | 8.1±0.7***  | N/R | 8 | N/R |
| <b>t des</b><br>(ms)   | 2.8±0.3 | 0.8±0.08*** | N/R | 8 | N/R |

(\*\*\*) p < 0.001

**Supplemental Table S2 Whole-Cell Recordings for Compound 2,3-BDZ-2**

| Receptor Name/Compounds abbreviation | GluA1 (Glutamate Alone)   | 2,3-BDZ-2   | Applying Glutamate Alone After 2,3-BDZ-2 | n | A/A <sub>I</sub> |
|--------------------------------------|---------------------------|-------------|------------------------------------------|---|------------------|
| <b>Amplitude</b><br>(pA)             | 913±37                    | 93±10.0***  | 914±40                                   | 8 | 9.82±0.7         |
| <b>t deact</b><br>(ms)               | N/R                       | 3.6±0.3**   | N/R                                      | 8 | N/R              |
| <b>t des</b><br>(ms)                 | N/R                       | 1.8±0.1**   | N/R                                      | 8 | N/R              |
| Receptor Name/Compounds abbreviation | GluA1/2 (Glutamate Alone) | 2,3-BDZ-2   | Applying Glutamate Alone After 2,3-BDZ-2 | n | A/A <sub>I</sub> |
| <b>Amplitude</b><br>(pA)             | 521±25                    | 53±3.0***   | 523±33                                   | 8 | 9.91±0.6         |
| <b>t deact</b><br>(ms)               | N/R                       | 3.9±0.4**   | N/R                                      | 8 | N/R              |
| <b>t des</b><br>(ms)                 | N/R                       | 3.8±0.3**   | N/R                                      | 8 | N/R              |
| Receptor Name/Compounds abbreviation | GluA2 (Glutamate Alone)   | 2,3-BDZ-2   | Applying Glutamate Alone After 2,3-BDZ-2 | n | A/A <sub>I</sub> |
| <b>Amplitude</b><br>(pA)             | 1312±38                   | 127±12.0*** | 1310±42                                  | 8 | 10.42±0.8        |
| <b>t deact</b><br>(ms)               | N/R                       | 5.1±0.4**   | N/R                                      | 8 | N/R              |
| <b>t des</b>                         | N/R                       | 1.6±0.05**  | N/R                                      | 8 | N/R              |

| (ms)                                 |                           |                        |                                          |   |                  |
|--------------------------------------|---------------------------|------------------------|------------------------------------------|---|------------------|
| Receptor Name/Compounds abbreviation | GluA2/3 (Glutamate Alone) | 2,3-BDZ-2              | Applying Glutamate Alone After 2,3-BDZ-2 | n | A/A <sub>I</sub> |
| Amplitude (pA)                       | 536±22                    | 52±7.0 <sup>***</sup>  | 532±26                                   | 8 | 10.28±0.6        |
| t deact (ms)                         | N/R                       | 4.8±0.5 <sup>**</sup>  | N/R                                      | 8 | N/R              |
| t des (ms)                           | N/R                       | 1.7±0.08 <sup>**</sup> | N/R                                      | 8 | N/R              |

(\*\*) p < 0.01, and (\*\*\*) p < 0.001

**Supplemental Table S3 Whole-Cell Recordings for Compound 2,3-BDZ-3**

| Receptor Name/Compounds abbreviation | GluA1 (Glutamate Alone)   | 2,3-BDZ-3             | Applying Glutamate Alone After 2,3-BDZ-3 | n | A/A <sub>I</sub> |
|--------------------------------------|---------------------------|-----------------------|------------------------------------------|---|------------------|
| Amplitude (pA)                       | 934±13                    | 237±12 <sup>**</sup>  | 936±46                                   | 8 | 3.94±0.2         |
| t deact (ms)                         | N/R                       | 2.4±0.1 <sup>ns</sup> | N/R                                      | 8 | N/R              |
| t des (ms)                           | N/R                       | 2.1±0.1 <sup>ns</sup> | N/R                                      | 8 | N/R              |
| Receptor Name/Compounds abbreviation | GluA1/2 (Glutamate Alone) | 2,3-BDZ-3             | Applying Glutamate Alone After 2,3-BDZ-3 | n | A/A <sub>I</sub> |
| Amplitude (pA)                       | 572±24                    | 144±11 <sup>**</sup>  | 569±43                                   | 8 | 3.98±0.2         |
| t deact (ms)                         | N/R                       | 2.8±0.2 <sup>ns</sup> | N/R                                      | 8 | N/R              |
| t des (ms)                           | N/R                       | 4.9±0.3 <sup>ns</sup> | N/R                                      | 8 | N/R              |

| Receptor Name/Compounds abbreviation | GluA2 (Glutamate Alone)   | 2,3-BDZ-3             | Applying Glutamate Alone After 2,3-BDZ-3 | n | A/A <sub>1</sub> |
|--------------------------------------|---------------------------|-----------------------|------------------------------------------|---|------------------|
| Amplitude (pA)                       | 1352±28                   | 326±17**              | 1251±65                                  | 8 | 4.16±0.2         |
| t deact (ms)                         | N/R                       | 2.8±0.1 <sup>ns</sup> | N/R                                      | 8 | N/R              |
| t des (ms)                           | N/R                       | 2.3±0.1 <sup>ns</sup> | N/R                                      | 8 | N/R              |
| Receptor Name/Compounds abbreviation | GluA2/3 (Glutamate Alone) | 2,3-BDZ-3             | Applying Glutamate Alone After 2,3-BDZ-3 | n | A/A <sub>1</sub> |
| Amplitude (pA)                       | 529±12                    | 130±12**              | 525±22                                   | 8 | 4.08±0.3         |
| t deact (ms)                         | N/R                       | 2.9±0.2 <sup>ns</sup> | N/R                                      | 8 | N/R              |
| t des (ms)                           | N/R                       | 2.5±0.2 <sup>ns</sup> | N/R                                      | 8 | N/R              |

(\*\*) p < 0.01, and ns denoting not significant

**Supplemental Table S4 Whole-Cell Recordings for Compound 2,3-BDZ-4**

| Receptor Name/Compounds abbreviation | GluA1 (Glutamate Alone)   | 2,3-BDZ-4             | Applying Glutamate Alone After 2,3-BDZ-4 | n | A/A <sub>1</sub> |
|--------------------------------------|---------------------------|-----------------------|------------------------------------------|---|------------------|
| Amplitude (pA)                       | 944±16                    | 277±14**              | 942±44                                   | 8 | 3.41±0.2         |
| t deact (ms)                         | N/R                       | 2.3±0.1 <sup>ns</sup> | N/R                                      | 8 | N/R              |
| t des (ms)                           | N/R                       | 2.2±0.1 <sup>ns</sup> | N/R                                      | 8 | N/R              |
| Receptor Name/Compounds abbreviation | GluA1/2 (Glutamate Alone) | 2,3-BDZ-4             | Applying Glutamate Alone After 2,3-BDZ-4 | n | A/A <sub>1</sub> |

|                                                     |                                          |                       |                                                             |          |                        |
|-----------------------------------------------------|------------------------------------------|-----------------------|-------------------------------------------------------------|----------|------------------------|
| <b>Amplitude<br/>(pA)</b>                           | 584±28                                   | 170±9**               | 583±40                                                      | 8        | 3.44±0.2               |
| <b>t deact<br/>(ms)</b>                             | N/R                                      | 2.7±0.2 <sup>ns</sup> | N/R                                                         | 8        | N/R                    |
| <b>t des<br/>(ms)</b>                               | N/R                                      | 5.0±0.3 <sup>ns</sup> | N/R                                                         | 8        | N/R                    |
| <b>Receptor<br/>Name/Compounds<br/>abbreviation</b> | <b>GluA2<br/>(Glutamate<br/>Alone)</b>   | <b>2,3-BDZ-4</b>      | <b>Applying<br/>Glutamate<br/>Alone After<br/>2,3-BDZ-4</b> | <b>n</b> | <b>A/A<sub>1</sub></b> |
| <b>Amplitude<br/>(pA)</b>                           | 1341±15                                  | 364±17**              | 1340±52                                                     | 8        | 3.68±0.1               |
| <b>t deact<br/>(ms)</b>                             | N/R                                      | 2.7±0.1 <sup>ns</sup> | N/R                                                         | 8        | N/R                    |
| <b>t des<br/>(ms)</b>                               | N/R                                      | 2.5±0.1 <sup>ns</sup> | N/R                                                         | 8        | N/R                    |
| <b>Receptor<br/>Name/Compounds<br/>abbreviation</b> | <b>GluA2/3<br/>(Glutamate<br/>Alone)</b> | <b>2,3-BDZ-4</b>      | <b>Applying<br/>Glutamate<br/>Alone After<br/>2,3-BDZ-4</b> | <b>n</b> | <b>A/A<sub>1</sub></b> |
| <b>Amplitude<br/>(pA)</b>                           | 518±12                                   | 146±14**              | 516±23                                                      | 8        | 3.56±0.3               |
| <b>t deact<br/>(ms)</b>                             | N/R                                      | 2.8±0.2 <sup>ns</sup> | N/R                                                         | 8        | N/R                    |
| <b>t des<br/>(ms)</b>                               | N/R                                      | 2.6±0.2 <sup>ns</sup> | N/R                                                         | 8        | N/R                    |

(\*\*) p < 0.01 and ns denoting not significant



**Supplemental Table S5 IC<sub>50</sub> values**

| Receptor/Subunit | 2,3-BDZ Derivatives        | 2,3-BDZ-1 | 2,3-BDZ-2 | 2,3-BDZ-3 | 2,3-BDZ-4 |
|------------------|----------------------------|-----------|-----------|-----------|-----------|
| <b>GluA1</b>     | <b>IC<sub>50</sub></b>     | 3.26      | 3.51      | 5.80      | 6.80      |
|                  | <b>Log IC<sub>50</sub></b> | 0.51      | 0.54      | 0.76      | 0.83      |
|                  | <b>R square</b>            | 0.97      | 0.98      | 0.98      | 0.95      |

| Receptor/Subunit | 2,3-BDZ Derivatives        | 2,3-BDZ-1 | 2,3-BDZ-2 | 2,3-BDZ-3 | 2,3-BDZ-4 |
|------------------|----------------------------|-----------|-----------|-----------|-----------|
| <b>GluA1/2</b>   | <b>IC<sub>50</sub></b>     | 3.05      | 3.43      | 5.79      | 6.69      |
|                  | <b>Log IC<sub>50</sub></b> | 0.48      | 0.53      | 0.76      | 0.83      |
|                  | <b>R square</b>            | 0.97      | 0.98      | 0.98      | 0.99      |

| Receptor/Subunit | 2,3-BDZ Derivatives        | 2,3-BDZ-1 | 2,3-BDZ-2 | 2,3-BDZ-3 | 2,3-BDZ-4 |
|------------------|----------------------------|-----------|-----------|-----------|-----------|
| <b>GluA2</b>     | <b>IC<sub>50</sub></b>     | 3.02      | 3.36      | 5.74      | 6.75      |
|                  | <b>Log IC<sub>50</sub></b> | 0.48      | 0.53      | 0.76      | 0.83      |
|                  | <b>R square</b>            | 0.97      | 0.97      | 0.98      | 0.97      |

| Receptor/Subunit | 2,3-BDZ Derivatives        | 2,3-BDZ-1 | 2,3-BDZ-2 | 2,3-BDZ-3 | 2,3-BDZ-4 |
|------------------|----------------------------|-----------|-----------|-----------|-----------|
| <b>GluA2/3</b>   | <b>IC<sub>50</sub></b>     | 3.09      | 3.45      | 5.76      | 6.69      |
|                  | <b>Log IC<sub>50</sub></b> | 0.49      | 0.54      | 0.76      | 0.83      |
|                  | <b>R square</b>            | 0.97      | 0.97      | 0.99      | 0.99      |

**Supplemental Figure S1: The inhibition assays of four 2,3-BDZ derivatives on GluA1, GluA2, GluA1/2, and GluA2/3 subunits.** These four figures depict the  $A/A_I$  ratio, which signifies the ratio between normal (excitatory) and inhibitory currents. a shows the  $A/A_I$  measured for GluA1 subunit after applying the four 2,3-BDZ compounds, while b shows the  $A/A_I$  measured for GluA1/2 subunit after applying the four 2,3-BDZ compounds, c shows the  $A/A_I$  measured for GluA2 subunit after applying the four 2,3-BDZ compounds, and d shows the  $A/A_I$  measured for GluA2/3 subunit after applying the four 2,3-BDZ compounds. The experiment involves conducting a whole-cell current recording under controlled conditions of pH 7.4, temperature of 22 °C, and a voltage of -60 mV. The data are presented in the format of mean  $\pm$  standard error of the mean (SEM), with a sample size of  $n = 8$  representing the number of patch cells in the whole-cell configuration. The statistical significance of the one-way ANOVA results is denoted as follows: (\*\*)  $p < 0.01$ , and (\*\*\*)  $p < 0.001$ .

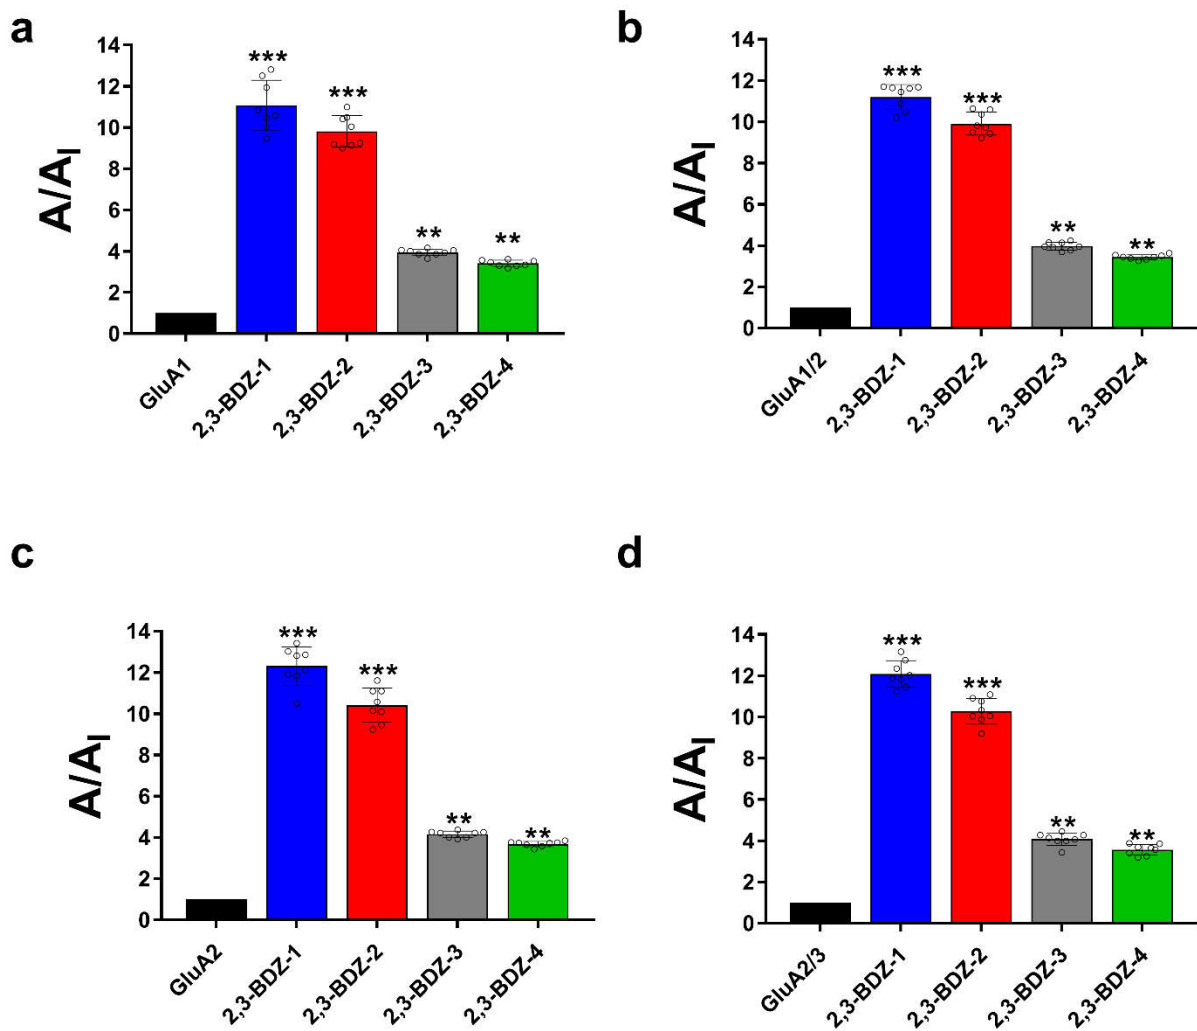

Supplement: s1 [file s1]
